# Supplementary material for: FDG positron emission tomography imaging and ctDNA detection as an early dynamic biomarker of everolimus efficacy in advanced luminal breast cancer
Source: PubMed Central journal article supplement (PMC8455671; doi:10.1038/s41523-021-00331-8), 2021-09-21
Supplement: 41523_2021_331_MOESM1_ESM.pdf [file 41523_2021_331_MOESM1_ESM.pdf]

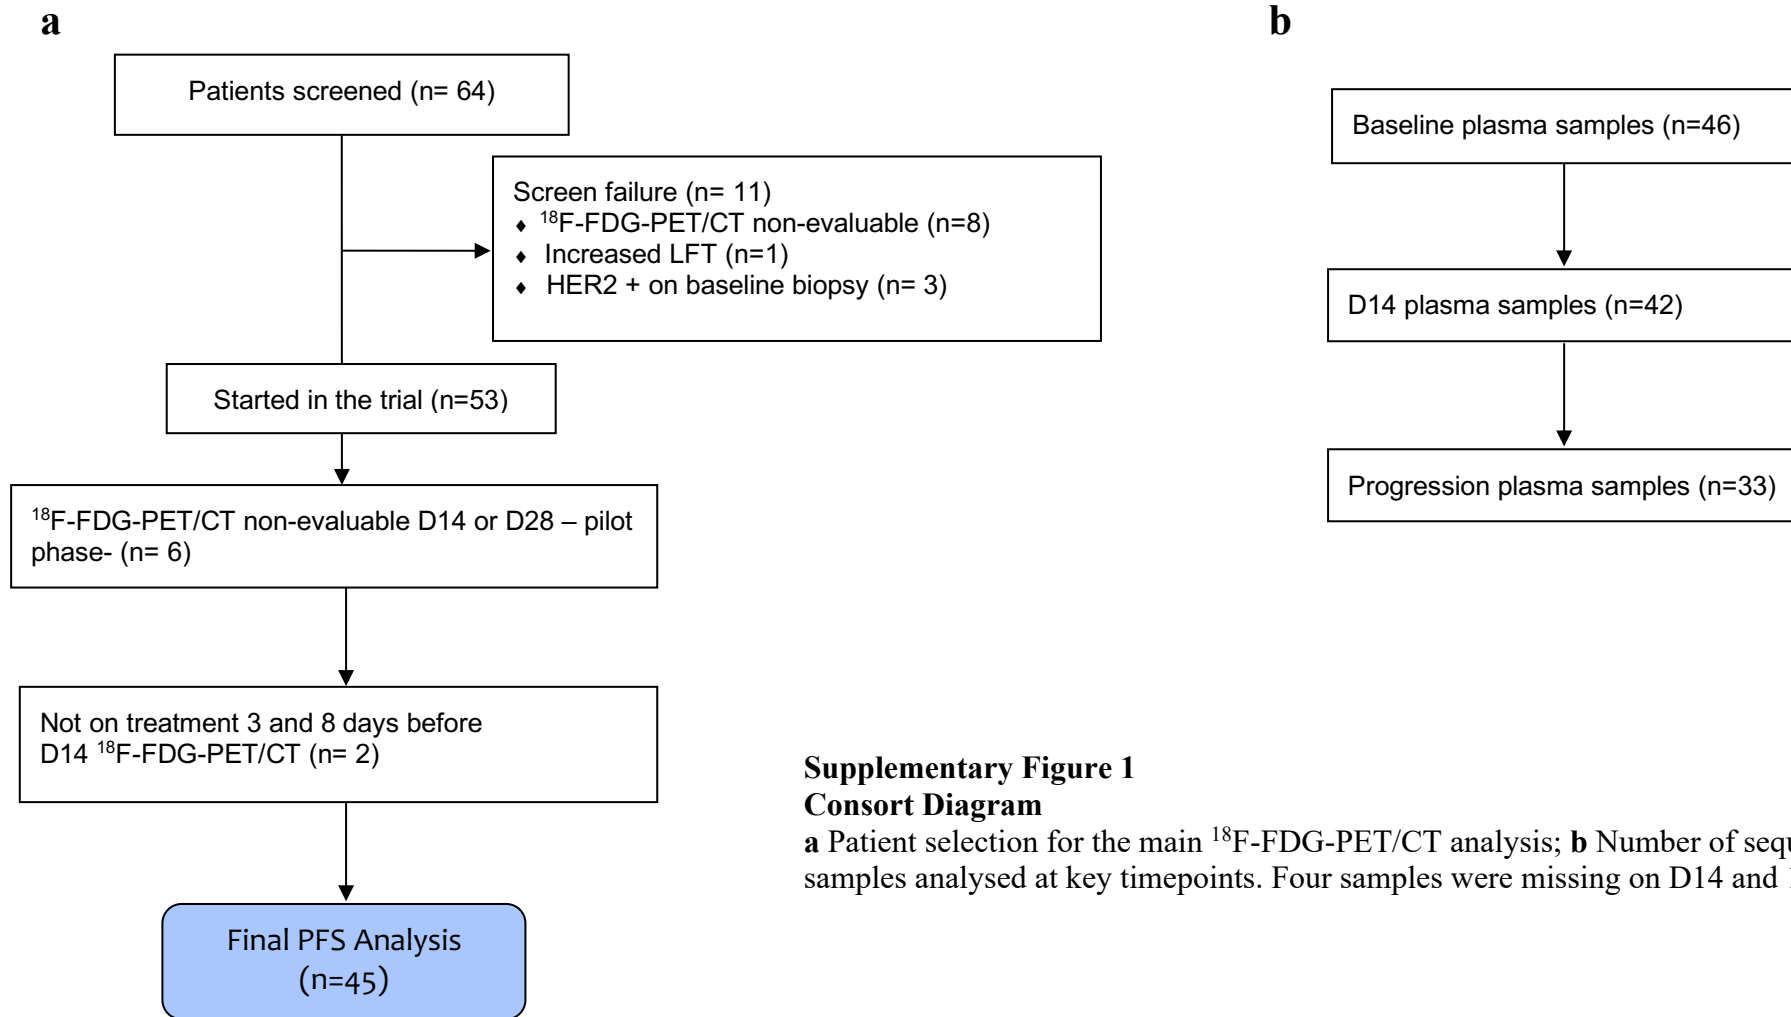

**Supplementary Figure 1  
Consort Diagram**

**a** Patient selection for the main <sup>18</sup>F-FDG-PET/CT analysis; **b** Number of sequential plasma samples analysed at key timepoints. Four samples were missing on D14 and 13 at progression

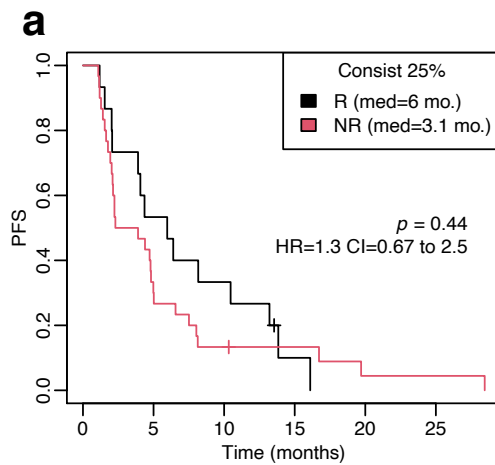

Number at risk

|    |    |   |   |   |   |   |
|----|----|---|---|---|---|---|
| R  | 15 | 8 | 5 | 1 |   |   |
| NR | 30 | 9 | 4 | 3 | 1 | 1 |

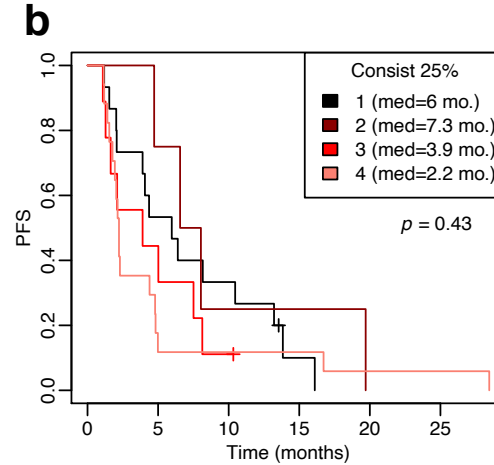

Number at risk

|   |    |   |   |   |   |   |
|---|----|---|---|---|---|---|
| 1 | 15 | 8 | 5 | 1 |   |   |
| 2 | 4  | 3 | 1 | 1 |   |   |
| 3 | 9  | 4 | 1 |   |   |   |
| 4 | 17 | 2 | 2 | 2 | 1 | 1 |

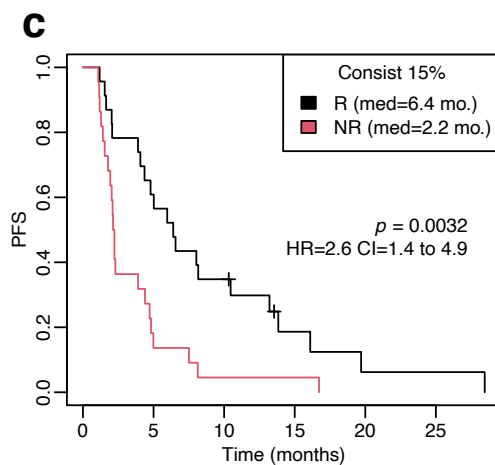

Number at risk

|    |    |    |   |   |   |   |
|----|----|----|---|---|---|---|
| R  | 23 | 14 | 8 | 3 | 1 | 1 |
| NR | 22 | 3  | 1 | 1 |   |   |

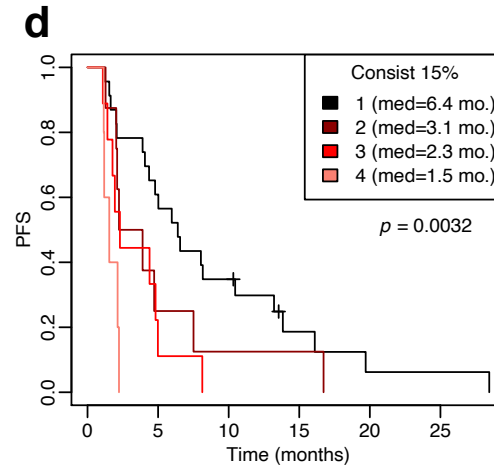

Number at risk

|   |    |    |   |   |   |   |
|---|----|----|---|---|---|---|
| 1 | 23 | 14 | 8 | 3 | 1 | 1 |
| 2 | 8  | 2  | 1 | 1 |   |   |
| 3 | 9  | 1  |   |   |   |   |
| 4 | 5  |    |   |   |   |   |

## Supplementary Figure 2

**Kaplan-Meier plots of progression free survival (PFS) according to <sup>18</sup>F-FDG-PET/CT evaluation 14 days after the start of treatment with exemestane-everolimus.**

**a PET evaluation using two classes (response R, non response NR):** Response is considered as  $\geq 25\%$  homogenous decrease in maximum standardized uptake value (SUVmax) in all target lesions (R), failure to fulfil this criterion is considered non-response (NR)

**b PET evaluation using 4 classes and 25% cut-off:** 1 – no metabolic non-responsive lesion, 2 – minority of lesions are non-responders among the whole body target lesions, 3 – majority of lesions are non-responders among the whole body target lesions, 4 – none of the target lesions shows a response

**c PET evaluation using two classes (response R, non response NR):** Response is considered as  $\geq 15\%$  homogenous decrease in maximum standardized uptake value (SUVmax) in all target lesions (R), failure to fulfil this criterion is considered non-response (NR)

**d PET evaluation using 4 classes and 15% cut off:** 1 – no metabolic non-responsive lesion, 2 – minority of lesions are non-responders among the whole body target lesions, 3 – majority of lesions are non-responders among the whole body target lesions, 4 – none of the target lesions shows a response

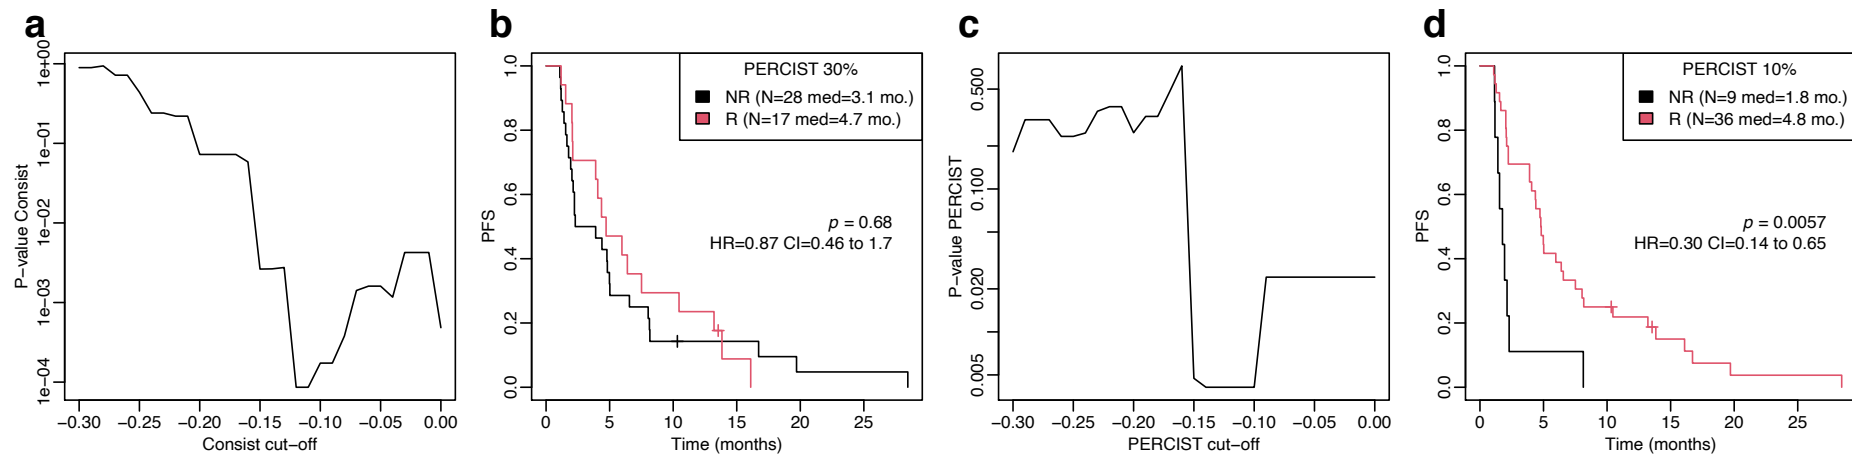

### Supplementary Figure 3

**Ability of differently defined metabolic responses to predict PFS. a** Evolution of the p-value of the link between PFS and metabolic response, with varying Consist cut-offs. **b** PFS according to PERCIST (Positron Emission Tomography –PET- Response Criteria in Solid Tumors) with the standard 30% threshold. **c** Effect of the cut-offs on PERCIST. **d** PERSIST vs. PFS using the 10% cut-off.

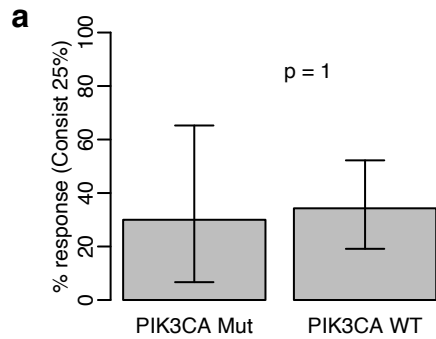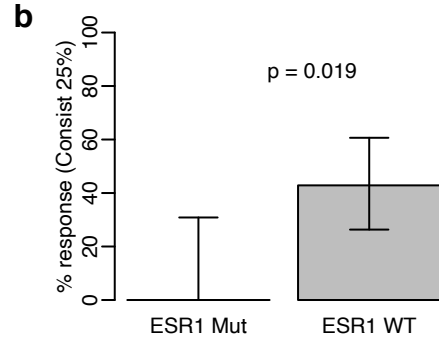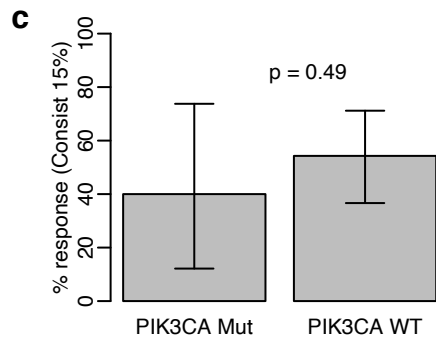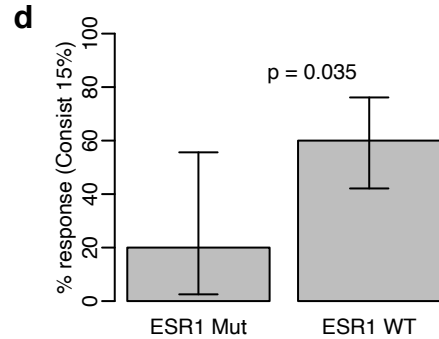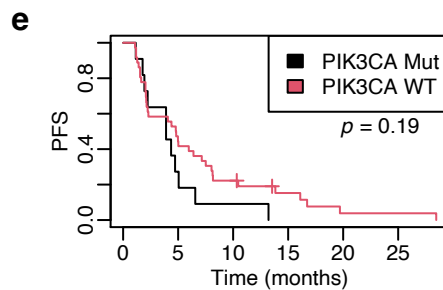

Number at risk

|            |    |    |   |   |   |   |
|------------|----|----|---|---|---|---|
| PIK3CA Mut | 11 | 3  | 1 |   |   |   |
| PIK3CA WT  | 36 | 16 | 8 | 4 | 1 | 1 |

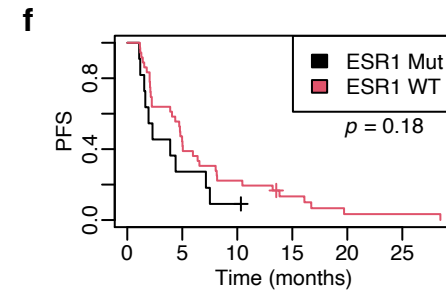

Number at risk

|          |    |    |   |   |   |   |
|----------|----|----|---|---|---|---|
| ESR1 Mut | 11 | 3  | 1 |   |   |   |
| ESR1 WT  | 36 | 16 | 8 | 4 | 1 | 1 |

**Supplementary Figure 4**  
**Association between ctDNA mutation detection in *PIK3CA* and *ESR1* genes at baseline and either**

$^{18}\text{F}$ -FDG-PET/CT response according to Consist criteria using a 25% cut-off (**a, b**) or

$^{18}\text{F}$ -FDG-PET/CT response according to Consist criteria using a 15% cut-off (**c, d**) or

Progression Free Survival, PFS (**e, f**)

In panels a-d data represented are mean values. Error bars represent 95% confidence intervals (obtained from the binomial test in R). “p” denotes p values.

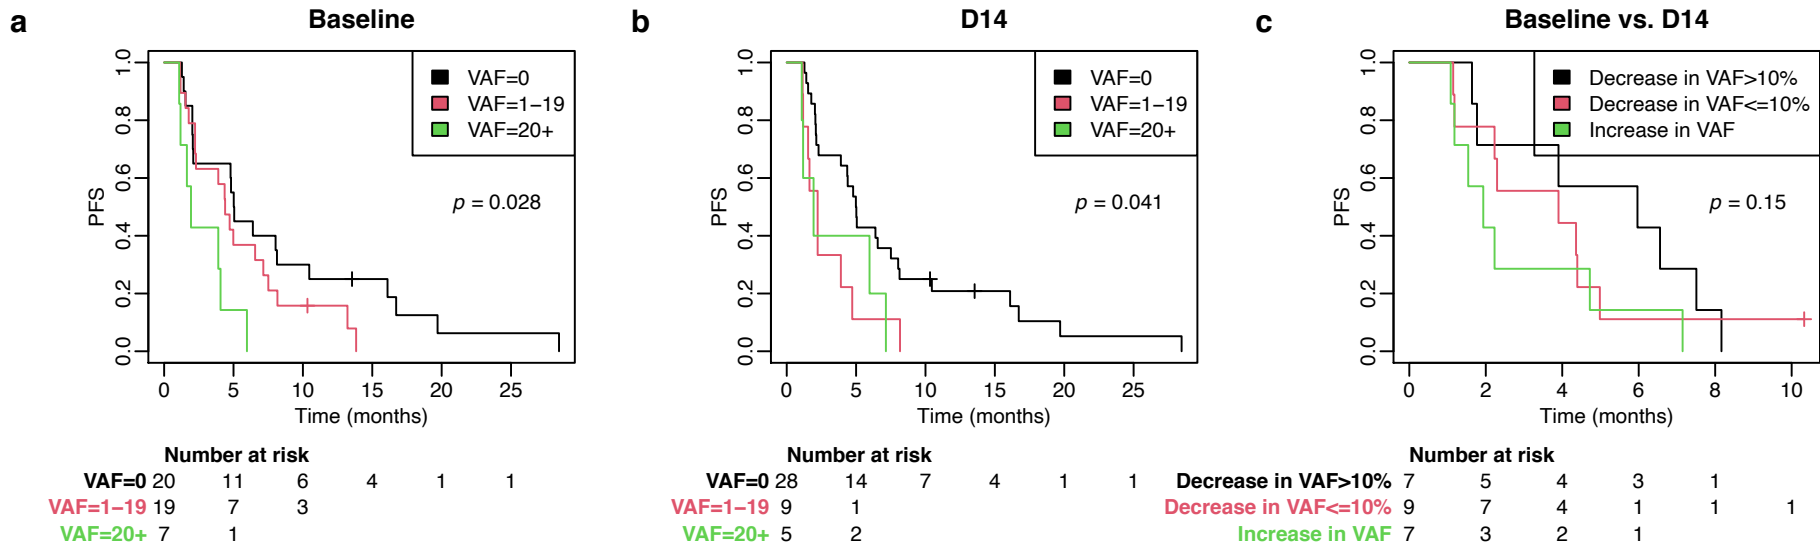

**Supplementary Figure 5**

**Prognostic value of Variant allele frequency (VAF) of SNVs (single nucleotide variants) detected by targeted gene sequencing in plasma cell free DNA at different time-points. VAF is expressed in %.**

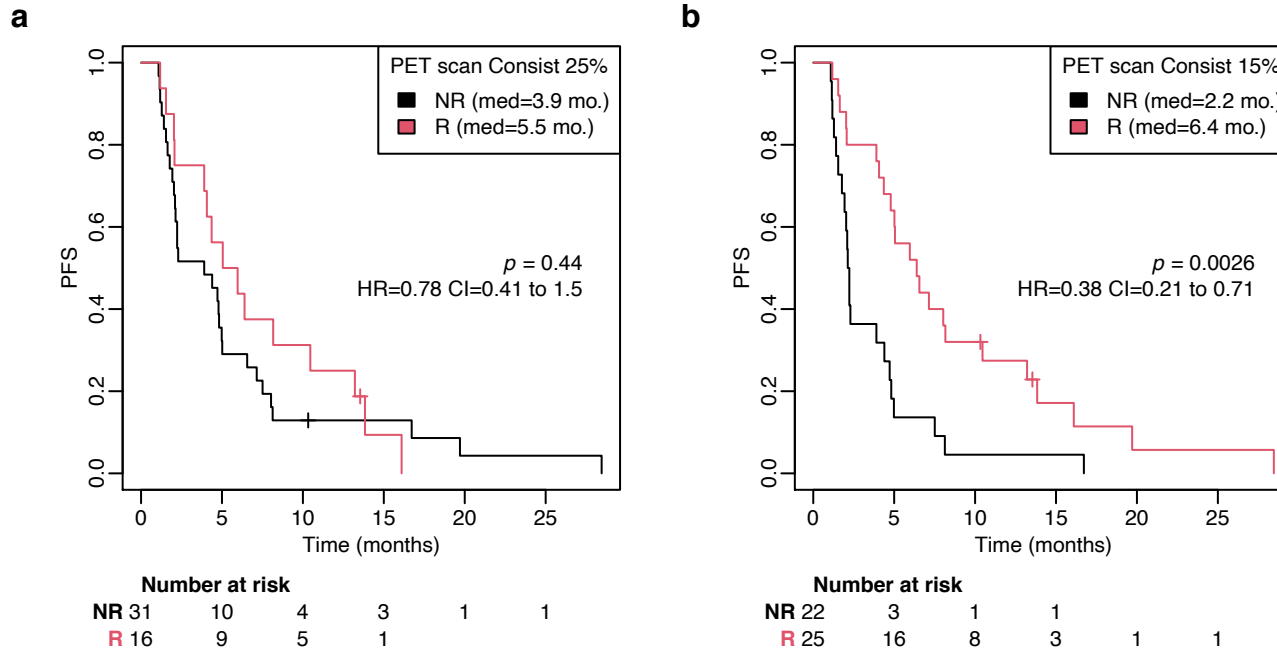

**Supplementary Figure 6 (refers to “data not shown” on page 8 of the manuscript)**

**Kaplan-Meier plots of progression free survival (PFS) according to  $^{18}\text{F}$ -FDG-PET/CT evaluation 14 days after the start of treatment with exemestane-everolimus in the ITT population (n=47)**

- Consist 15%: Response is considered as  $\geq 15\%$  homogenous decrease in maximum standardized uptake value (SUVmax) in all target lesions (R), Failure to fulfil this criterion is considered non-response (NR)
- Consist 25%: Response is considered as  $\geq 25\%$  homogenous decrease in maximum standardized uptake value (SUVmax) in all target lesions (R), Failure to fulfil this criterion is considered non-response (NR)

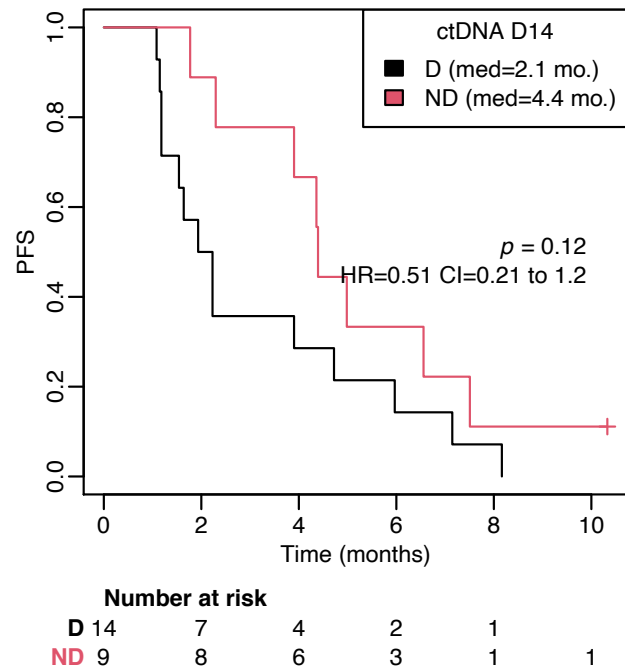

### Supplementary Figure 7

Kaplan-Meier plot of progression free survival (PFS) according to ctDNA detection 14 days after the start of treatment with exemestane-everolimus in patients in whom ctDNA was detected at baseline and had available sample on D14 (n=23)

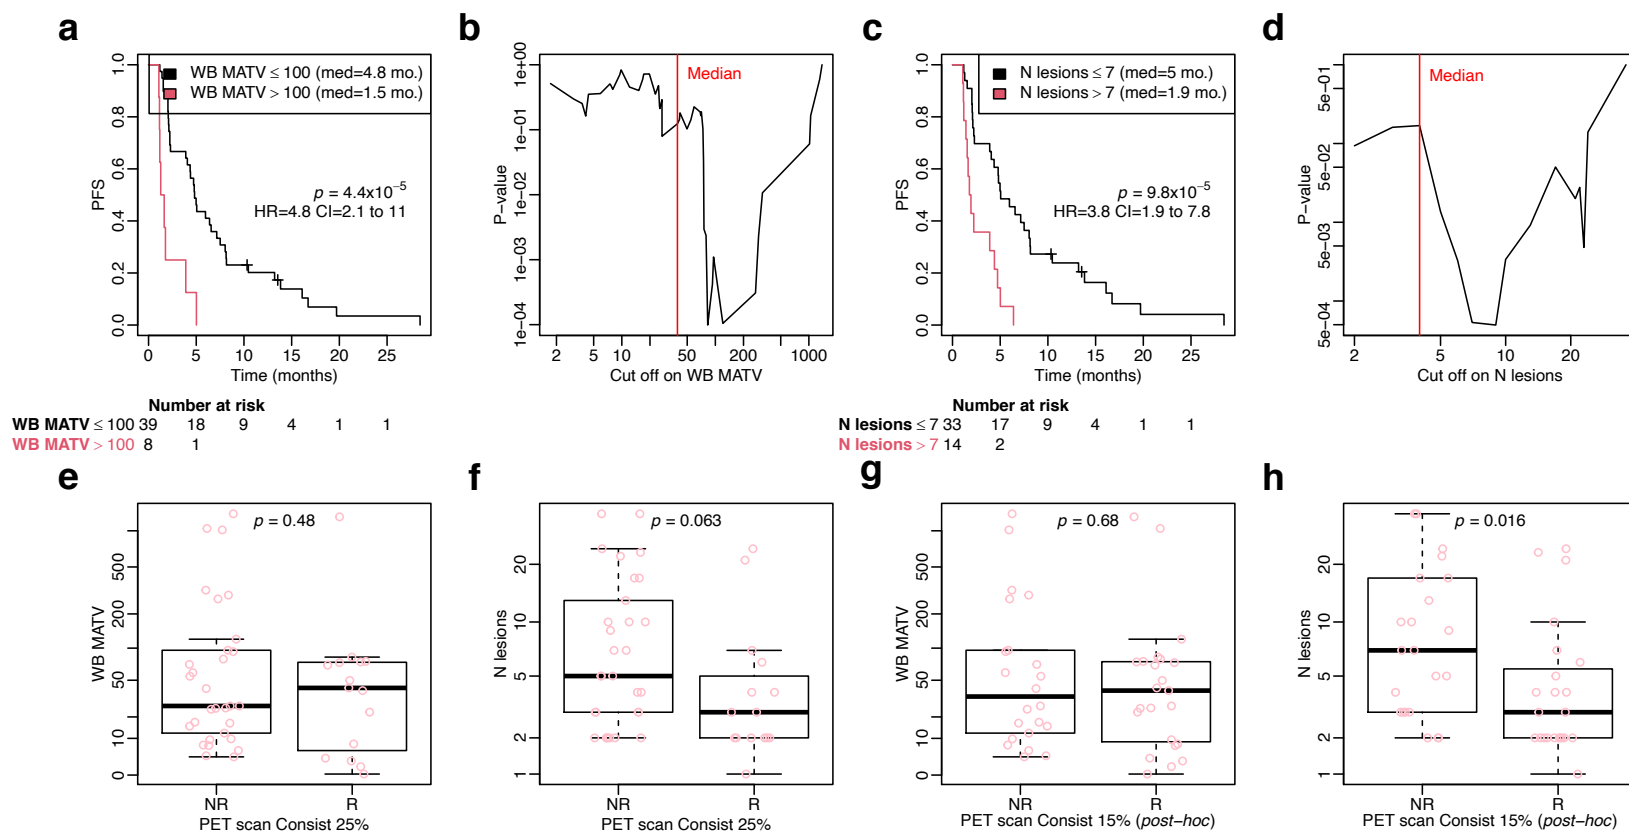

**Supplementary Figure 8**

**Kaplan-Meier plots of progression free survival (PFS) and  $^{18}F$ -FDG-PET/CT response according to Metabolically Active Tumor Volume (MATV) and number of metabolically active metastatic lesions assessed on baseline  $^{18}F$ -FDG-PET/CT. **a** PFS in patients with  $MATV > 100\ cm^3$  compared to PFS of patients with  $MATV \leq 100\ cm^3$ . **b** Evolution of p value with varying MATV cut-offs. **c** PFS in patients with  $> 7$  metastatic lesions compared to PFS of patients with  $\leq 7$  metastatic lesions. **d** Evolution of p value with varying cut-off for the number of metastatic lesions. **e** Association between  $^{18}F$ -FDG-PET/CT response (according to Consist criteria using a 25% cut-off) and MATV. **f** Association between  $^{18}F$ -FDG-PET/CT response (according to Consist criteria using a 25% cut-off) and the number of metastatic lesions. **g** Association between  $^{18}F$ -FDG-PET/CT response (according to Consist criteria using a 15% cut-off) and MATV. **h** Association between  $^{18}F$ -FDG-PET/CT response (according to Consist criteria using a 15% cut-off) and MATV. Box plots are standard R boxplots, in that the boxes represent interquartile range (IQR) while the whiskers extend to the furthest points that are closer than 1.5IQR from the box.**



|       |        |        |        |       |        |       |       |
|-------|--------|--------|--------|-------|--------|-------|-------|
| AKT1  | ALK    | AR     | BRAF   | BTK   | CTNNB1 | DDR2  | EGFR  |
| ERBB2 | ESR1   | EZH2   | FBXW7  | FGFR1 | FGFR2  | FGFR3 | FOXL2 |
| GNA11 | GNAQ   | GNAS   | HRAS   | IDH1  | IDH2   | JAK2  | JAK3  |
| KIT   | KRAS   | MAP2K1 | MAP2K2 | MET   | MPL    | MTOR  | NPM1  |
| NRAS  | PDGFRA | PIK3CA | PTEN   | RAF1  | RET    | ROS1  | TP53  |

**Supplementary Table 1**

**Targeted gene sequencing panel used for sequencing of plasma samples able to identify single nucleotide variants (SNVs) from 40 genes**

| Patient | cDNA baseline (genomes/ml) | cDNA D14 (genomes/ml) | cDNA progression (genomes/ml) | Nmut | Gene  | Chr       | Start     | End       | cDNA Variant     | Amino Acid Variant | Biological Impact | VAF baseline (%) | mutated cDNA baseline (genomes/ml) | VAF D14 (%) | mutated cDNA D14 (genomes/ml) | VAF progression (%) | mutated cDNA progression (genomes/ml) | Gene 2  | Chr 2   | Start 2   | End 2     | cDNA Variant 2 | Amino Acid Variant 2 | Biological Impact 2 | VAF baseline (%) 2 | mutated cDNA baseline (genomes/ml) 2 | VAF D14 (%) 2 | mutated cDNA D14 (genomes/ml) 2 | VAF progression (%) 2 | mutated cDNA progression (genomes/ml) 2 |  |
|---------|----------------------------|-----------------------|-------------------------------|------|-------|-----------|-----------|-----------|------------------|--------------------|-------------------|------------------|------------------------------------|-------------|-------------------------------|---------------------|---------------------------------------|---------|---------|-----------|-----------|----------------|----------------------|---------------------|--------------------|--------------------------------------|---------------|---------------------------------|-----------------------|-----------------------------------------|--|
| 2       | 267575.758                 | 235454.545            | 712121.2121                   | 2    | ESR1  | chr6      | 151977826 | 152450754 | c.1613A>G        | p.D538G            | pathogenic        | 21               | 562290.9091                        | 8           | 18836.36364                   | 13                  | 92575.75758                           | PK3CA   | chr3    | 178865902 | 178957881 | c.1624G>A      | p.E542K              | pathogenic          | 24                 | 642618.1818                          | 10            | 23545.45455                     | 15                    | 106818.1818                             |  |
| 3       | 31212.212121               | 48484.84885           | 32121.21212                   | 1    | ESR1  | chr6      | 151977826 | 152450754 | c.1613A>G        | p.D538G            | pathogenic        | 6                | 1872.727273                        | 2           | 969.6969697                   | 2                   | 642.4242424                           |         |         |           |           |                |                      |                     |                    |                                      |               |                                 |                       |                                         |  |
| 5       | 33333.33333                | 78484.84885           | 59096.9097                    | 0    |       |           |           |           |                  |                    |                   |                  |                                    |             |                               |                     |                                       |         |         |           |           |                |                      |                     |                    |                                      |               |                                 |                       |                                         |  |
| 7       | 103636.3636                | 149696.97             | 83333.33333                   | 2    | ESR1  | chr6      | 151977826 | 152450754 | c.1613A>G        | p.D538G            | pathogenic        | 33               | 34200                              | 42          | 62872.72727                   | 16                  | 13333.33333                           | PK3CA   | chr3    | 178865902 | 178957881 | c.1633G>A      | p.E545K              | pathogenic          | 36                 | 37309.09091                          | 37            | 55387.87879                     | 21                    | 17500                                   |  |
| 9       | 91212.212121               | 41818.1818            | 2                             | ESR1 | chr6  | 151977826 | 152450754 | c.1609T>A | p.Y537N          | pathogenic         | 7                 | 6384.848485      | 0                                  | 0           |                               |                     |                                       |         |         |           |           |                |                      |                     |                    |                                      |               |                                 |                       |                                         |  |
| 12      | 59090.90909                | 47272.7273            | 67878.78788                   | 2    | PK3CA | chr3      | 178865902 | 178957881 | c.1633G>C        | p.E545Q            | pathogenic        | 0                | 0                                  | 12          | 5672.727273                   | 9                   | 6109.00909                            | TP53    | chr17   | 7565097   | 7590856   | c.625A>T       | p.R209*              | pathogenic          | 7                  | 4136.363636                          | 15            | 7090.909091                     | 24                    | 16290.90909                             |  |
| 20      | 56606.60606                |                       | 137576.7576                   | 2    | PTEN  | chr10     | 89622870  | 89731687  | c.275A>T         | p.D92V             | pathogenic        | 8                | 4484.848485                        | 9           | 12381.81818                   | TP53                | chr17                                 | 7565097 | 7590856 | c.22C>T   | p.P85     | pathogenic     | 45                   | 25227.27273         |                    |                                      |               |                                 |                       |                                         |  |
| 27      | 42424.24242                | 63939.3939            | 120606.0606                   | 1    | PK3CA | chr3      | 178865902 | 178957881 | c.1035T>A        | p.N845K            | pathogenic        | 4                | 1696.969697                        | 8           | 5115.151515                   | 15                  | 18090.90909                           |         |         |           |           |                |                      |                     |                    |                                      |               |                                 |                       |                                         |  |
| 28      | 87272.72727                |                       | 58787.87879                   | 1    | AKT1  | chr14     | 105235686 | 105262088 | c.496G>A         | p.E17K             | pathogenic        | 8                | 6981.818182                        | 6           | 3527.272727                   |                     |                                       |         |         |           |           |                |                      |                     |                    |                                      |               |                                 |                       |                                         |  |
| 29      | 54545.45455                | 77575.7576            | 67575.75758                   | 0    |       |           |           |           |                  |                    |                   |                  |                                    |             |                               |                     |                                       |         |         |           |           |                |                      |                     |                    |                                      |               |                                 |                       |                                         |  |
| 30      | 43636.36364                | 40909.0909            | 144545.4545                   | 1    | PK3CA | chr3      | 178865902 | 178957881 | c.1035T>A        | p.N845K            | pathogenic        | 19               | 8290.909091                        | 0           | 0                             | 33                  | 47700                                 |         |         |           |           |                |                      |                     |                    |                                      |               |                                 |                       |                                         |  |
| 33      | 90000                      | 65454.5455            | 118484.8485                   | 0    |       |           |           |           |                  |                    |                   |                  |                                    |             |                               |                     |                                       |         |         |           |           |                |                      |                     |                    |                                      |               |                                 |                       |                                         |  |
| 34      | 49090.90909                | 103151.5152           | 44242.42424                   | 0    |       |           |           |           |                  |                    |                   |                  |                                    |             |                               |                     |                                       |         |         |           |           |                |                      |                     |                    |                                      |               |                                 |                       |                                         |  |
| 35      | 119393.9394                | 174545.455            | 756666.6667                   | 1    | ERBB2 | chr17     | 37844167  | 37886679  | c.2313_2324dup   | p.Y772_A775dup     | pathogenic        | 10               | 11939.39394                        | 4           | 6981.818182                   | 6                   | 45400                                 |         |         |           |           |                |                      |                     |                    |                                      |               |                                 |                       |                                         |  |
| 39      | 45454.54545                | 54545.4545            | 60606.06061                   | 0    |       |           |           |           |                  |                    |                   |                  |                                    |             |                               |                     |                                       |         |         |           |           |                |                      |                     |                    |                                      |               |                                 |                       |                                         |  |
| 42      | 478787.8788                | 300606.06061          | 166969.697                    | 0    |       |           |           |           |                  |                    |                   |                  |                                    |             |                               |                     |                                       |         |         |           |           |                |                      |                     |                    |                                      |               |                                 |                       |                                         |  |
| 44      | 3253030.303                | 2636060.6061          |                               | 1    | TP53  | chr17     | 7565097   | 7590856   | c.343del         | p.H151fs*8         | pathogenic        | 64               | 2081939.394                        | 78          | 2056127.273                   |                     |                                       |         |         |           |           |                |                      |                     |                    |                                      |               |                                 |                       |                                         |  |
| 45      | 60000                      | 103939.394            | 193333.3333                   | 0    |       |           |           |           |                  |                    |                   |                  |                                    |             |                               |                     |                                       |         |         |           |           |                |                      |                     |                    |                                      |               |                                 |                       |                                         |  |
| 46      | 62424.24242                | 58181.8182            | 54545.45455                   | 1    | ESR1  | chr6      | 151977826 | 152450754 | c.1613A>G        | p.D538G            | pathogenic        | 4                | 2496.969697                        | 0           | 0                             | 1                   | 545.4545455                           |         |         |           |           |                |                      |                     |                    |                                      |               |                                 |                       |                                         |  |
| 47      | 40000                      | 50000                 | 158181.8182                   | 1    | ESR1  | chr6      | 151977826 | 152450754 | c.1609T>A        | p.Y537N            | pathogenic        | 3                | 1200                               | 0           | 0                             | 1                   | 1581.818182                           |         |         |           |           |                |                      |                     |                    |                                      |               |                                 |                       |                                         |  |
| 49      | 1883636.364                | 332121.2121           |                               | 1    | ESR1  | chr6      | 151977826 | 152450754 | c.1613A>G        | p.D538G            | pathogenic        | 40               | 753454.5455                        | 1           | 3321.212121                   |                     |                                       |         |         |           |           |                |                      |                     |                    |                                      |               |                                 |                       |                                         |  |
| 50      | 62121.21212                | 156969.697            | 150606.0606                   | 1    | PK3CA | chr3      | 178865902 | 178957881 | c.1633G>A        | p.E545K            | pathogenic        | 4                | 2484.848485                        | 1           | 1569.69697                    | 4                   | 6024.242424                           |         |         |           |           |                |                      |                     |                    |                                      |               |                                 |                       |                                         |  |
| 52      | 118181.81818               | 55884.8488            | 476060.6061                   | 0    |       |           |           |           |                  |                    |                   |                  |                                    |             |                               |                     |                                       |         |         |           |           |                |                      |                     |                    |                                      |               |                                 |                       |                                         |  |
| 53      | 46363.63636                | 75151.5152            |                               | 0    |       |           |           |           |                  |                    |                   |                  |                                    |             |                               |                     |                                       |         |         |           |           |                |                      |                     |                    |                                      |               |                                 |                       |                                         |  |
| 51      | 119393.9394                | 106060.606            | 113636.3636                   | 1    | PK3CA | chr3      | 178865902 | 178957881 | c.3140A>T        | p.H1047L           | pathogenic        | 2                | 2387.878788                        | 0           | 0                             | 2                   | 2272.727273                           |         |         |           |           |                |                      |                     |                    |                                      |               |                                 |                       |                                         |  |
| 55      | 103151.51515               | 110303.03             | 123030.303                    | 0    |       |           |           |           |                  |                    |                   |                  |                                    |             |                               |                     |                                       |         |         |           |           |                |                      |                     |                    |                                      |               |                                 |                       |                                         |  |
| 56      | 109393.9394                | 87272.7273            |                               | 1    | AKT1  | chr14     | 105235686 | 105262088 | c.496G>A         | p.E17K             | pathogenic        | 3                | 3281.818182                        | 0           | 0                             |                     |                                       |         |         |           |           |                |                      |                     |                    |                                      |               |                                 |                       |                                         |  |
| 59      | 231818.1818                | 156969.697            |                               | 0    |       |           |           |           |                  |                    |                   |                  |                                    |             |                               |                     |                                       |         |         |           |           |                |                      |                     |                    |                                      |               |                                 |                       |                                         |  |
| 62      | 226969.697                 |                       |                               | 0    |       |           |           |           |                  |                    |                   |                  |                                    |             |                               |                     |                                       |         |         |           |           |                |                      |                     |                    |                                      |               |                                 |                       |                                         |  |
| 61      | 63939.39394                | 432424.2424           |                               | 1    | PK3CA | chr3      | 178865902 | 178957881 | c.1633G>A        | p.E545K            | pathogenic        | 3                | 1918.181818                        | 0           | 0                             |                     |                                       |         |         |           |           |                |                      |                     |                    |                                      |               |                                 |                       |                                         |  |
| 64      | 179090.909                 |                       |                               | 0    |       |           |           |           |                  |                    |                   |                  |                                    |             |                               |                     |                                       |         |         |           |           |                |                      |                     |                    |                                      |               |                                 |                       |                                         |  |
| 11      | 83636.36364                | 86060.6061            | 889696.9697                   | 1    | AKT1  | chr14     | 105235686 | 105262088 | c.496G>A         | p.E17K             | pathogenic        | 12               | 10036.36364                        | 1           | 860.6060606                   | 33                  | 338084.8485                           |         |         |           |           |                |                      |                     |                    |                                      |               |                                 |                       |                                         |  |
| 14      | 60000                      |                       | 48181.81818                   | 0    |       |           |           |           |                  |                    |                   |                  |                                    |             |                               |                     |                                       |         |         |           |           |                |                      |                     |                    |                                      |               |                                 |                       |                                         |  |
| 17      | 61515.15152                | 175454.5455           | 94545.45455                   | 1    | EZH2  | chr7      | 148504475 | 148581413 | c.148508717_4C>T | -                  | pathogenic        | 56               | 34448.48485                        | 40          | 70181.81818                   | 41                  | 38763.63636                           |         |         |           |           |                |                      |                     |                    |                                      |               |                                 |                       |                                         |  |
| 19      | 82121.21212                |                       | 151212.1212                   | 1    | PK3CA | chr3      | 178865902 | 178957881 | c.1258T>C        | p.C420R            | pathogenic        | 4                | 3284.848485                        | 14          | 21169.69697                   |                     |                                       |         |         |           |           |                |                      |                     |                    |                                      |               |                                 |                       |                                         |  |
| 22      |                            | 303030.303            | 162121.2121                   | 1    | PK3CA | chr3      | 178865902 | 178957881 | c.1340_1366del   | p.P447_L455del     | pathogenic        | 0                | 0                                  | 2           | 3242.424242                   |                     |                                       |         |         |           |           |                |                      |                     |                    |                                      |               |                                 |                       |                                         |  |
| 24      | 94545.45455                | 76666.6667            | 80909.09091                   | 0    |       |           |           |           |                  |                    |                   |                  |                                    |             |                               |                     |                                       |         |         |           |           |                |                      |                     |                    |                                      |               |                                 |                       |                                         |  |
| 26      | 56666.66667                | 88484.84885           | 327878.7879                   | 1    | ESR1  | chr6      | 151977826 | 152450754 | c.1613A>G        | p.D538G            | pathogenic        | 14               | 7933.333333                        | 19          | 16812.12121                   | 33                  | 108200                                |         |         |           |           |                |                      |                     |                    |                                      |               |                                 |                       |                                         |  |
| 32      | 35454.54545                | 175757.576            | 78181.81818                   | 0    |       |           |           |           |                  |                    |                   |                  |                                    |             |                               |                     |                                       |         |         |           |           |                |                      |                     |                    |                                      |               |                                 |                       |                                         |  |
| 40      | 52121.21212                | 114545.455            | 52424.24242                   | 0    |       |           |           |           |                  |                    |                   |                  |                                    |             |                               |                     |                                       |         |         |           |           |                |                      |                     |                    |                                      |               |                                 |                       |                                         |  |
| 41      | 57575.75758                | 46060.6061            |                               | 0    |       |           |           |           |                  |                    |                   |                  |                                    |             |                               |                     |                                       |         |         |           |           |                |                      |                     |                    |                                      |               |                                 |                       |                                         |  |
| 48      | 113636.3636                | 87272.7273            |                               | 2    | PK3CA | chr3      | 178865902 | 178957881 | c.3140A>G        | p.H1047R           | pathogenic        | 16               | 18181.81818                        | 0           | 0                             |                     |                                       | TP53    | chr17   | 7565097   | 7590856   | c.839G>C       | p.R280T              | pathogenic          | 13                 | 14772.72727                          | 0             | 0                               |                       |                                         |  |
| 54      | 40000                      | 98484.84885           |                               | 0    |       |           |           |           |                  |                    |                   |                  |                                    |             |                               |                     |                                       |         |         |           |           |                |                      |                     |                    |                                      |               |                                 |                       |                                         |  |
| 57      | 53636.36364                | 285454.545            | 84848.48485                   | 0    |       |           |           |           |                  |                    |                   |                  |                                    |             |                               |                     |                                       |         |         |           |           |                |                      |                     |                    |                                      |               |                                 |                       |                                         |  |
| 58      | 25757.57576                | 52727.2727            |                               | 1    | ESR1  | chr6      | 151977826 | 152450754 | c.1613A>G        | p.D538G            | pathogenic        | 3                | 772.7272727                        | 0           | 0                             |                     |                                       |         |         |           |           |                |                      |                     |                    |                                      |               |                                 |                       |                                         |  |
| 60      | 182121.2121                | 182424.242            | 2227878.788                   | 2    | ESR1  | chr6      | 151977826 | 152450754 | c.1610A>C        | p.Y537S            | pathogenic        | 21               | 38345.45455                        | 25          | 0                             | 38                  | 846593.9394                           | PTEN    | chr10   | 89622870  | 89731687  | c.416del       | p.L139fs*8           | pathogenic          | 23                 | 41887.87879                          | 26            | 47430.30303                     | 36                    | 802036.3636                             |  |
| 63      | 86666.66667                |                       |                               | 2    | AKT1  | chr14     | 105235686 | 105262088 | c.496G>A         | p.E17K             | pathogenic        | 2                | 1733.333333                        | 26          |                               |                     |                                       |         |         |           |           |                |                      |                     |                    |                                      |               |                                 |                       |                                         |  |

## Supplementary Table 2

<
